# Supplementary material
Source: publisher site journal article supplement (https://www.dovepress.com/article/523270)
Supplement: Supplementary file 1 [file 523270_Figure_S1_2.pdf]

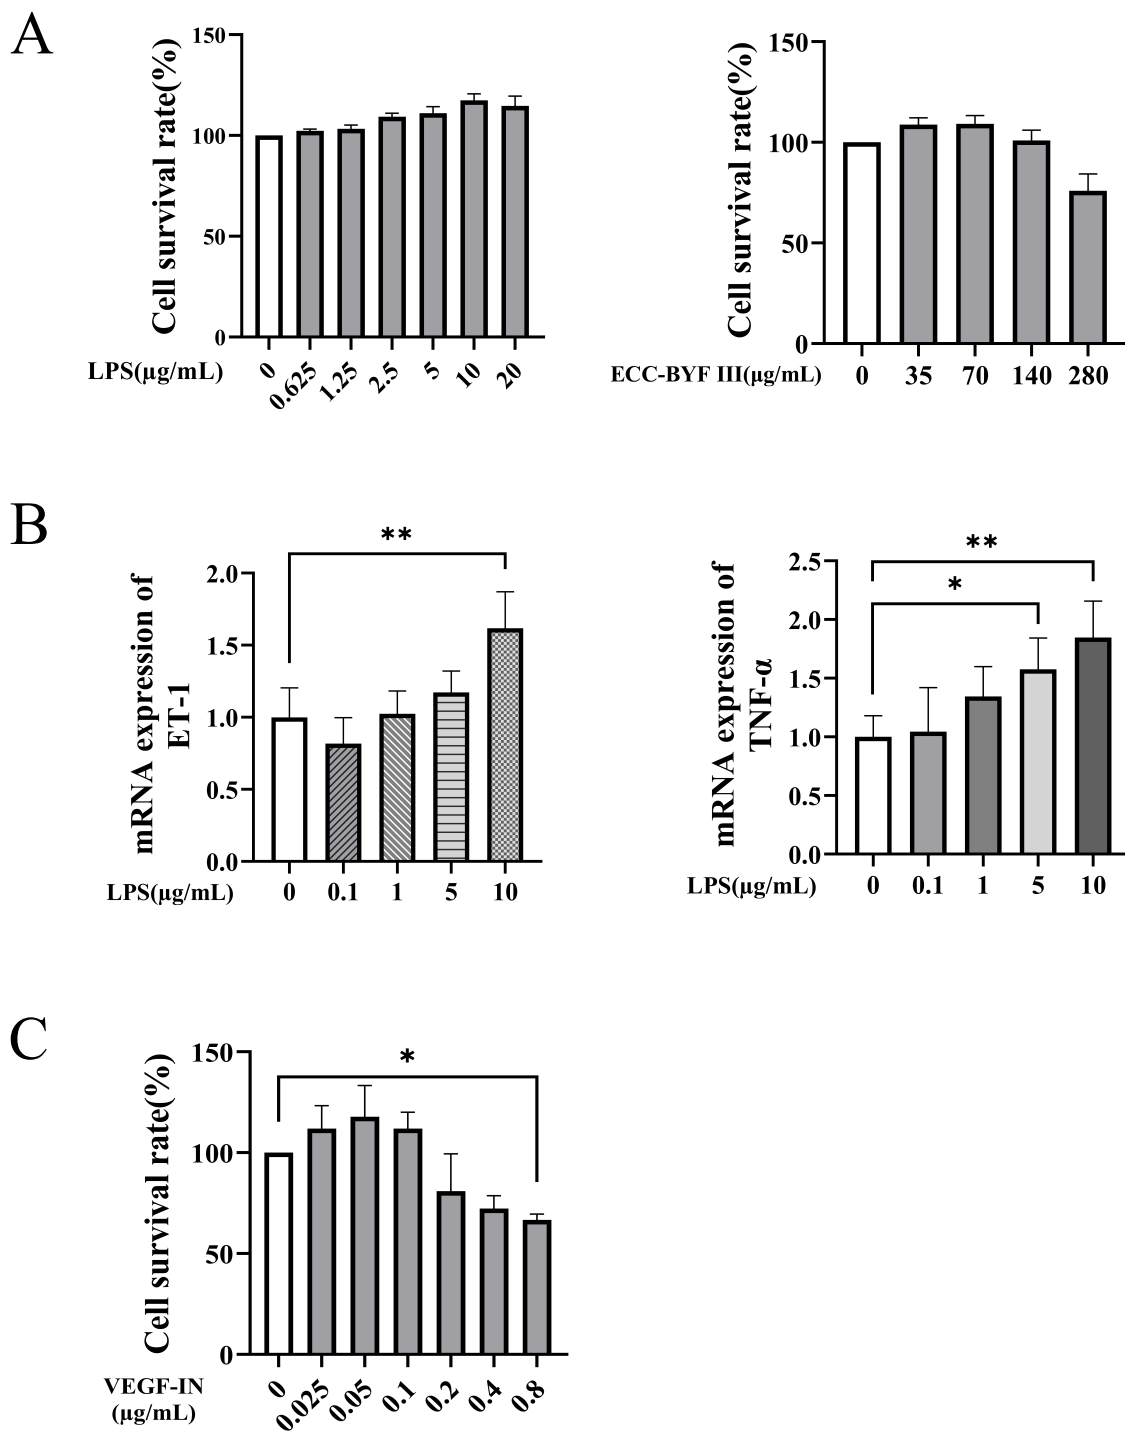

**Figure S1** Concentration screening of LPS, ECC-BYF, and VEGF-IN. (A) Effect of LPS and ECC-BYF III on the survival rate of HUVEC cells. (B) Effect of LPS on ET-1 mRNA and TNF- $\alpha$  mRNA in HUVEC cells. (C) Effect of ECC-BYF III on the survival rate of HUVEC cells. n=3. Data are expressed as the mean  $\pm$  SD of three independent experiments \*P < 0.05, \*\*P < 0.01.
